# Supplementary material for: Enhancement of synthesis of extracellular matrix proteins on retinoic acid loaded electrospun scaffolds
Source: Royal Society of Chemistry journal article supplement (doi:10.1039/c8tb01244j), 2018-01-01
Supplement: c8tb01244j1.pdf [file c8tb01244j1.pdf]

## Supplementary Information

### Enhancement of extracellular matrix proteins on retinoic acid loaded electrospun scaffolds

Febriyani F. R. Damanik, Clemens van Blitterswijk, Joris Rotmans, Lorenzo Moroni\*

F.F.R. Damanik, Prof. C. van Blitterswijk, Dr. L. Moroni

University of Twente, Drienerlolaan 5, Zuidhorst 145, 7522 NB Enschede, the Netherlands

Maastricht University, MERLN Institute for Technology-Inspired Regenerative Medicine,  
Universiteitsingel 40, 6229 ER Maastricht, the Netherlands

Dr. J. Rotmans

Department of Internal Medicine, Leiden University Medical Center, Albinusdreef 2, 2333ZA Leiden, The Netherlands

\*Corresponding Author: Lorenzo Moroni. E-mail: [l.moroni@maastrichtuniversity.nl](mailto:l.moroni@maastrichtuniversity.nl)

**Supplementary Table 1. Fibre diameter quantification.**

| Electrospun scaffold | 15 kV          | 30 kV            |
|----------------------|----------------|------------------|
| PCL                  | 0.94 ± 0.51 μm | 0.125 ± 0.047 μm |
| PCL + Retinoic acid  | 0.85 ± 0.43 μm | 0.108 ± 0.033 μm |
| PCL + minoxidil      | 1.04 ± 0.39 μm | 0.133 ± 0.028 μm |

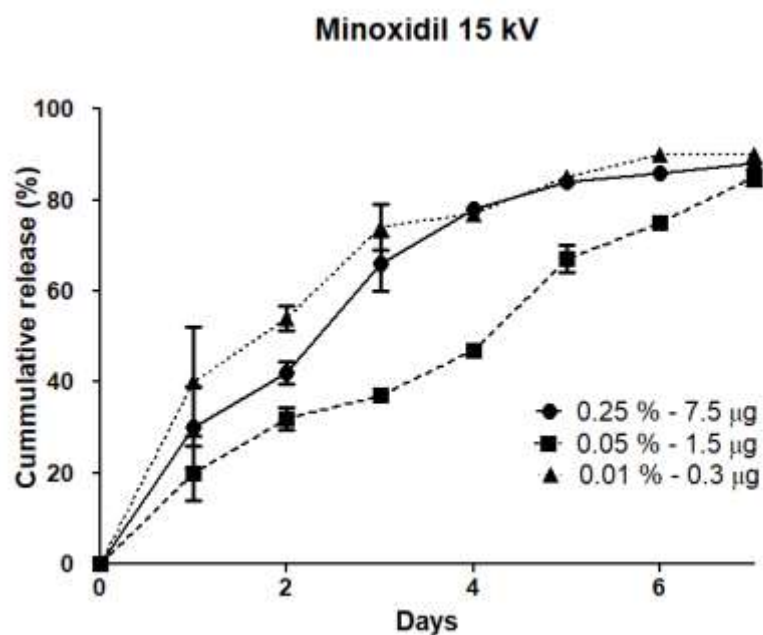

**Supplementary Figure 1. Release rate profile of Mn at 15 kV.** Mn release was measured up to day 7 for Mn-loaded PCL electrospun scaffolds at different concentration (%) and loading capacity (mg). Release profile showed a sustainable controlled release similar to RA-loaded PCL electrospun at 15 kV. Data are shown as mean ± s.d. (n = 3).

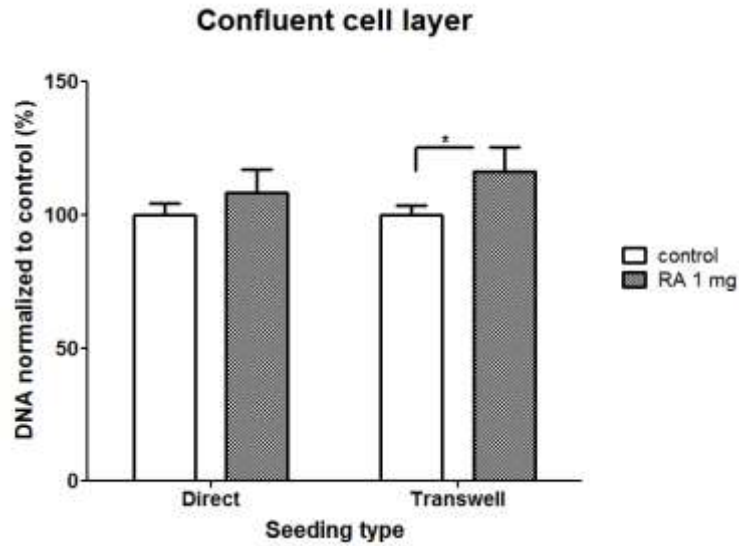

**Supplementary Figure 2. Growth analysis of confluent cell layer exposed in contact or non-contact to RA 0.05%-1mg scaffolds.** Direct seeding provided a slight increase in cell amount, while release of RA provided a significantly higher cell content. Black stars (\* $P < 0.05$ , \*\*  $P < 0.01$ , \*\*\*  $P < 0.001$ ) evaluate statistical differences between the different electrospun scaffold.

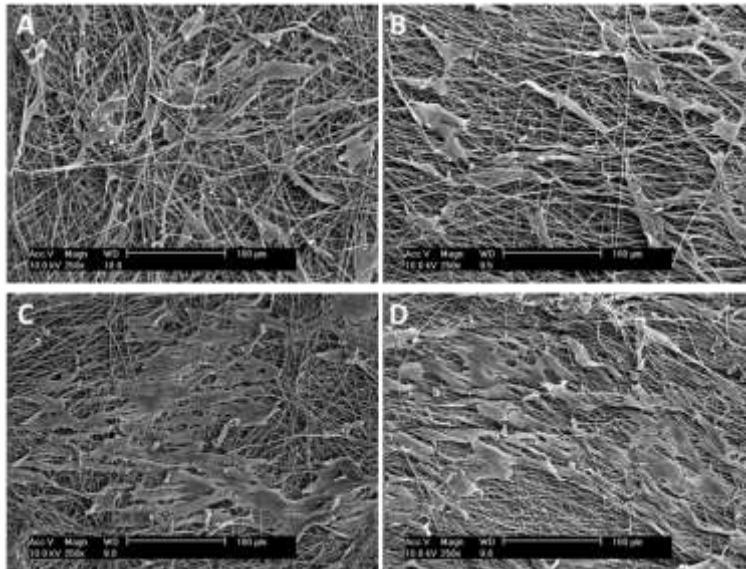

**Supplementary Figure 3. SEM images of HDF seeded directly to (a, c)PCL and (b, d) RA 0.05%-1mg electrospun scaffolds.** In (a-b) less confluent and (c-d) more confluent cell population, HDF were seen to be more flat in PCL electrospun scaffolds compared to RA 0.05%-1mg electrospun scaffolds.

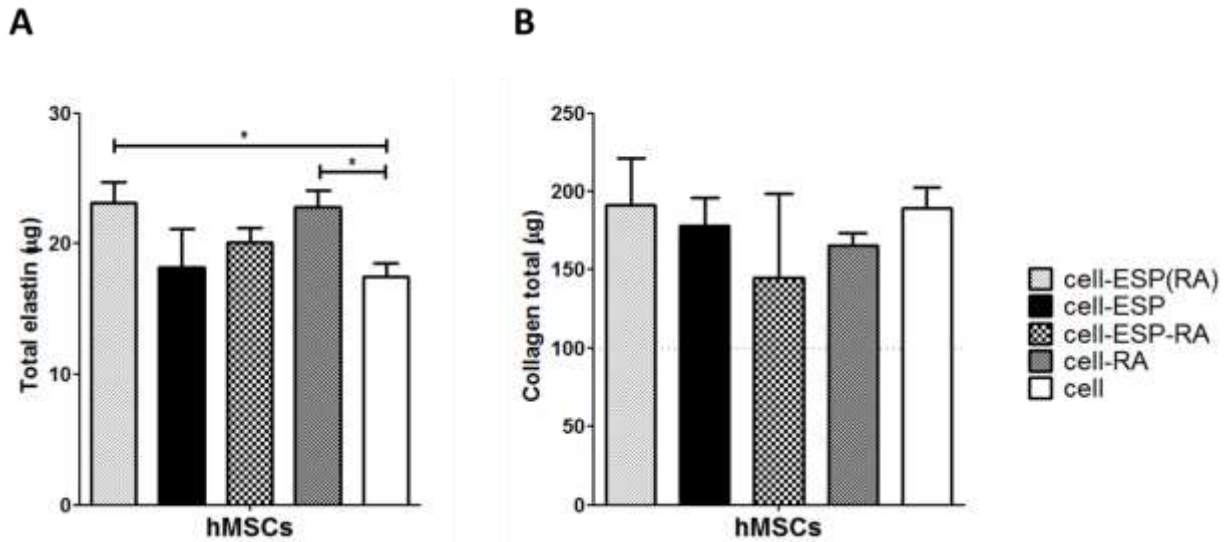

**Supplementary Figure 4. Total elastin and collagen analysis of hMSC culture at day 5.** Different seeding setups are represented by the different bar patterns. Data are shown as mean  $\pm$  s.d. ( $n = 3$ ). (a) Total elastin analysis displayed a significant increase in total elastin production in cell-ESP(RA) and cell-RA compared to cell control. (b) Overall, total collagen content in hMSCs cultured with exposure to RA 0.05%-1mg scaffold exhibit a decrease in total collagen synthesis, with exception to cell-ESP(RA). Black stars (\* $P < 0.05$ , \*\*  $P < 0.01$ , \*\*\*  $P < 0.001$ ) indicate statistical significances between the different culture setups.

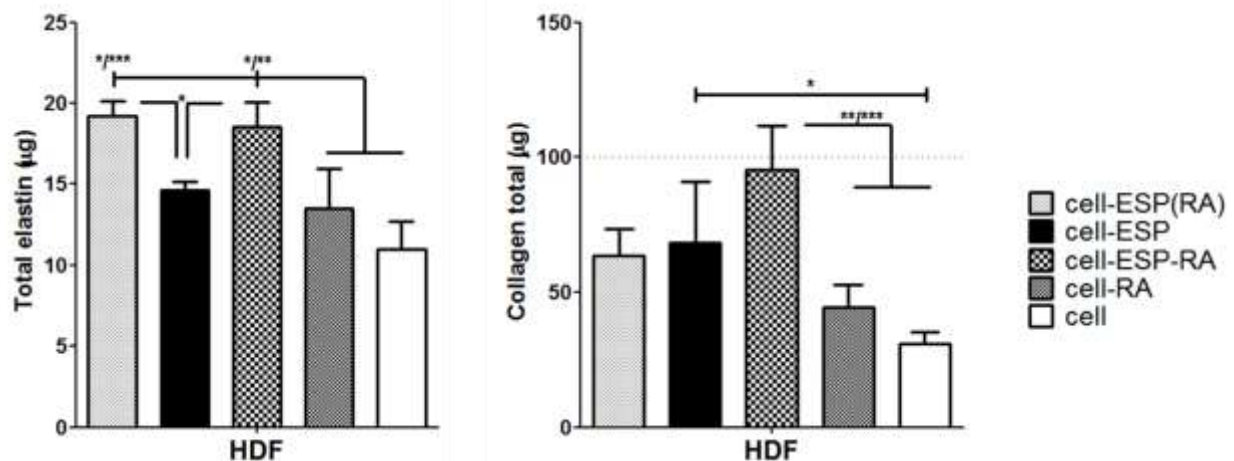

**Supplementary Figure 5. Total elastin and collagen analysis of HDF culture at day 5.** Different seeding setups are represented by the different bar patterns. Data are shown as mean  $\pm$  s.d. ( $n = 3$ ). (a) Total elastin analysis displayed cell-ESP(RA) and cell-ESP-RA to have a significantly higher total elastin content than all the other cultures. (b) Total collagen analysis showed that cell-ESP cultures provided a significantly higher total collagen production than Cell cultures. Cell-ESP-RA culture was significantly higher in total collagen content than cell-RA and cell cultures. Black stars (\* $P < 0.05$ , \*\*  $P < 0.01$ , \*\*\*  $P < 0.001$ ) indicate statistical significances between the different culture setups.

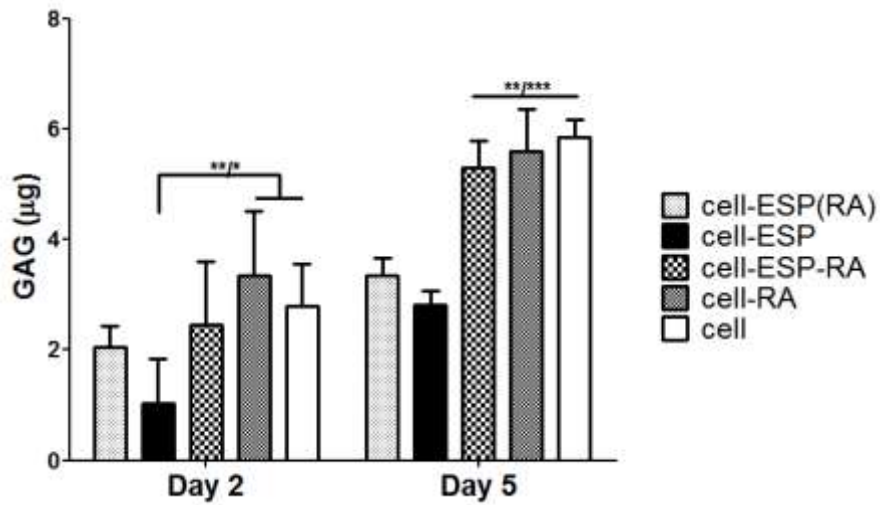

**Supplementary Figure 6. Total GAG analysis of hMSC cultures.** Different seeding setups are represented by the different bar patterns. Data are shown as mean  $\pm$  s.d. ( $n = 3$ ). At day 2, a significantly higher total GAG content was seen in cell-RA and cell cultures compared to cell-ESP cultures. At day 5, cell-ESP-RA, cell-RA and cell cultures displayed the a significantly higher total GAG content compared to cell-ESP and cell-ESP(RA) cultures. Black stars (\* $P < 0.05$ , \*\*  $P < 0.01$ , \*\*\*  $P < 0.001$ ) indicate statistical significances between the different culture setups.
